# Supplementary material for: Catalytic effect and recyclability of imidazolium-tagged bis(oxazoline) based catalysts in asymmetric Henry reactions
Source: Royal Society of Chemistry journal article supplement (doi:10.1039/c2ob06434k), 2011-12-07
Supplement: c2ob06434k.pdf [file c2ob06434k.pdf]

# Catalytic Effect and Recyclability of Imidazolium-Tagged Bis(oxazoline) Based Catalysts in Asymmetric Henry Reactions

Zhi-Ming Zhou,<sup>\*a,b</sup> Zhi-Huai Li,<sup>a</sup> Xiao-Yan Hao,<sup>a</sup> Jun Zhang,<sup>a</sup> Xiao Dong,<sup>a</sup> Ying-Qiang Liu,<sup>a</sup> Wen-Wen Sun,<sup>a</sup> Dan Cao,<sup>a</sup> Jin-Liang Wang,<sup>a</sup>

<sup>a</sup> R&D Center for Pharmaceuticals, School of Chemical Engineering and the Environment, Beijing Institute of Technology, Beijing, PR China. 100081; Fax: +86 010 68912664; Tel: +86 010 68912664; E-mail: zzm@bit.edu.cn

<sup>b</sup> State Key Laboratory of Explosion Science and Technology, Beijing Institute of Technology, Beijing PR China. 100081.

## Supplementary data

### 1. General procedure for the enantioselective Henry reaction

To an oven dried 10 mL two necked round-bottomed flask, a solution of ligand (0.05 mmol) and Cu(OAc)<sub>2</sub>·H<sub>2</sub>O. (9.80 mg, 0.049 mmol) in MeOH (1 mL) was stirred for 2 h at 25 °C. Then the aldehyde (0.34 mmol) and nitromethane (17 mmol) were added and the resulting mixture was stirred at 0 °C for the appropriate time. After completion as monitored by TLC, the solvent was removed and the resulting residue was purified by column chromatography on silica gel (Merck, 60–120 mesh, (ethyl acetate/hexane, 3:7) to afford the pure 2-nitroalcohol.

(*R*)-1-Phenyl-2-nitro ethanol **5a**

HPLC (Chiralcel OD-H, n-hexane/*i*-PrOH, 85:15 v/v, 0.8 mL/min, 23 °C, UV = 215 nm): *tr*(major) = 11.2 min, *tr*(minor) = 13.2 min;

(*R*)-1-(2-Methoxyphenyl)-2-nitroethanol **5b**

HPLC (Chiralcel OD-H, n-hexane/*i*-PrOH, 85:15 v/v, 0.8 mL/min, UV = 215 nm ): *tr*(major) = 9.8 min, *tr*(minor) = 11.3 min ;

(*R*)-1-(3-Methoxyphenyl)-2-nitroethanol **5c**

HPLC (Chiralcel OD-H, n-hexane/*i*-PrOH, 90:10 v/v, 0.8 mL/min, UV = 215 nm ): *tr*(major) = 45.6 min, *tr*(minor) = 60.1 min ;

(*R*)-1-(4-Methoxyphenyl)-2-nitroethanol **5d**

HPLC (Chiralcel OD-H, n-hexane/*i*-PrOH, 85:15 v/v, 0.8 mL/min, 23 °C, UV = 215 nm): *tr*(major) = 17.4min, *tr*(minor) = 22.1 min;

(*R*)-1-(4-Nitrophenyl)-2-nitroethanol **5e**

HPLC (Chiralcel OD-H, n-hexane/*i*-PrOH, 85:15 v/v, 0.8 mL/min, 23 °C, UV = 215 nm): *tr*(major) = 18.7 min, *tr*(minor) = 23.6 min;

(*R*)-1-(2-Nitrophenyl)-2-nitroethanol **5f**

HPLC (Chiralcel OD-H, n-hexane/*i*-PrOH, 90:10 v/v, 0.9 mL/min, 23 °C, UV = 215 nm): *tr*(major) = 14.5 min, *tr*(minor) = 16.2 min;

(*R*)-1-(2-Chlorophenyl)-2-nitroethanol **5g**

HPLC (Chiralcel OJ-H, n-hexane/*i*-PrOH, 90:10 v/v, 1 mL/min, 23 °C, UV = 214 nm): *tr*(major) = 14.4 min, *tr*(minor)= 16.1 min;

(*R*)-1-(4-Chlorophenyl)-2-nitroethanol **5h**

HPLC (Chiralcel OD-H, n-hexane/*i*-PrOH, 85:15v/v 0.8 mL/min, 23 °C, UV = 215 nm):

$tr(\text{major}) = 12.2 \text{ min}$ ,  $tr(\text{minor}) = 14.7 \text{ min}$ ;

**(R)-1-(3-Bromophenyl)-2-nitroethanol 5i**

HPLC (Chiralcel OD-H, n-hexane/*i*-PrOH, 90:10 v/v, 0.8 mL/min, 215 nm):  $tr(\text{major}) = 10.1 \text{ min}$ ,  $tr(\text{minor}) = 12.9 \text{ min}$ ;

**(R)-1-(4-Bromophenyl)-2-nitroethanol 5j**

HPLC (Chiralcel OD-H, n-hexane/*i*-PrOH, 85:15 v/v, 0.9 mL/min, 23 °C, UV = 215 nm):  $tr(\text{major}) = 11.1 \text{ min}$ ,  $tr(\text{minor}) = 14.2 \text{ min}$ ;

**(R)-1-(2-Fluorophenyl)-2-nitroethanol 5k**

HPLC (Chiralcel OD-H, n-hexane/*i*-PrOH, 90:10 v/v, 1.0 mL/min, 23 °C, UV = 215 nm):  $tr(\text{major}) = 10.1 \text{ min}$ ,  $tr(\text{minor}) = 10.9 \text{ min}$ ;

**(R)-1-(4-Fluorophenyl)-2-nitroethanol 5l**

HPLC (Chiralcel OD-H, n-hexane/*i*-PrOH, 90:10 v/v, 0.8 mL/min, 23 °C, UV = 215 nm):  $tr(\text{major}) = 13.4 \text{ min}$ ,  $tr(\text{minor}) = 15.9 \text{ min}$ ;

**(R)-1-(1-Naphthyl)-2-nitroethanol 5m**

HPLC (Chiralcel OD-H, n-hexane/*i*-PrOH, 85:15 v/v, 0.8 mL/min, 23 °C, UV = 215 nm):  $tr(\text{major}) = 14.3 \text{ min}$ ,  $tr(\text{minor}) = 20.1 \text{ min}$ ;

**(R)-1-(3,4-Dimethoxyphenyl)-2-nitroethanol 5n**

HPLC (Chiralcel OD-H, n-hexane/*i*-PrOH, 85:15 v/v, 0.8 mL/min, 23 °C, UV = 215 nm):  $tr(\text{major}) = 22.9 \text{ min}$ ,  $tr(\text{minor}) = 30.1 \text{ min}$ ;

**(R)-1-(2,4-Dichlorophenyl)-2-nitroethanol 5o**

HPLC (Chiralpak AD-H, n-hexane/*i*-PrOH, 90:10 v/v, 0.5 mL/min, 26 °C, UV = 215 nm):  $tr(\text{major}) = 15.9 \text{ min}$ ,  $tr(\text{minor}) = 18.9 \text{ min}$ ;

**(R)-1-(3,5-Dimethoxyphenyl)-2-nitroethanol 5p**

HPLC (Chiralpak AD-H, n-hexane/*i*-PrOH, 90:10 v/v, 1.0 mL/min, 23 °C, UV = 215 nm):  $tr(\text{major}) = 19.0 \text{ min}$ ,  $tr(\text{minor}) = 15.6 \text{ min}$ ;

**(R)-1-(pyridin-4-yl)-2-nitroethanol 5q**

HPLC (Chiralcel OD-H, n-hexane/*i*-PrOH, 75:25 v/v, 0.7 mL/min, 23 °C, UV = 215 nm):  $tr(\text{major}) = 12.0 \text{ min}$ ,  $tr(\text{minor}) = 13.8 \text{ min}$ ;

**(R)-1-Furfuryl-2-nitroethanol 5r**

HPLC (Chiralcel OD-H, n-hexane/*i*-PrOH, 85:15 v/v, 0.8 mL/min, 23 °C, UV = 215 nm):  $tr(\text{major}) = 57.7 \text{ min}$ ,  $tr(\text{minor}) = 62.3 \text{ min}$ ;

**(R)-2-nitro-1-(3,4,5-trimethoxyphenyl)ethanol 5s**

HPLC (Chiralcel OD-H, n-hexane/*i*-PrOH, 85:15 v/v, 0.8 mL/min, 23 °C, UV = 215 nm):  $tr(\text{major}) = 24.4 \text{ min}$ ,  $tr(\text{minor}) = 30.3 \text{ min}$

**2-nitro-1-phenylpropan-1-ol 9a**

HPLC (Chiralpak AD-H, n-hexane/*i*-PrOH, 95:5 v/v, 0.5 mL/min, 23 °C, UV = 215 nm): *Anti*(major) = 30.2 min, *Anti*(minor) = 26.5 min, *Syn*(major) = 41.6 min, *Syn*(minor) = 36.8 min

**2-nitro-1-(4-nitrophenyl)propan-1-ol 9e**

HPLC (Chiralcel OD-H, n-hexane/*i*-PrOH, 90:10 v/v, 1.0 mL/min, 23 °C, UV = 215 nm): *Anti*(tr) = 19.5 min, *Syn*(major) = 29.5 min, *Syn*(minor) = 36.5 min; (Chiralpak AD-H, n-hexane/*i*-PrOH, 90:10 v/v, 1.0 mL/min, 23 °C, UV = 215 nm): *Anti*(major) = 19.7 min, *Anti*(minor) = 26.2 min, *Syn* = 24.5 min.<sup>1</sup>

## 2. Theoretical calculations results of 10b-Cu-15a

---

| Center | Atomic | Atomic | Coordinates (Angstroms) |          |           |
|--------|--------|--------|-------------------------|----------|-----------|
| Number | Number | Type   | X                       | Y        | Z         |
| 1      | 29     | 0      | -2.547523               | 3.472950 | 0.353470  |
| 2      | 7      | 0      | -2.176275               | 2.398762 | -1.290894 |
| 3      | 8      | 0      | -3.397177               | 5.223514 | -1.797747 |
| 4      | 8      | 0      | -2.758552               | 3.888918 | 2.261416  |
| 5      | 8      | 0      | -4.316463               | 4.087856 | -0.082945 |
| 6      | 7      | 0      | -0.586019               | 3.918333 | 0.453722  |
| 7      | 6      | 0      | -4.345814               | 4.965512 | -1.039278 |
| 8      | 8      | 0      | -0.953934               | 1.541858 | -2.960568 |
| 9      | 6      | 0      | -4.065554               | 0.907083 | -1.914202 |
| 10     | 6      | 0      | -1.838960               | 8.909003 | 0.969569  |
| 11     | 1      | 0      | -2.285050               | 9.897252 | 0.896055  |
| 12     | 8      | 0      | 1.618376                | 3.787038 | 0.078650  |
| 13     | 6      | 0      | 0.381514                | 3.296649 | -0.113789 |
| 14     | 6      | 0      | -0.020335               | 5.008222 | 1.288087  |
| 15     | 1      | 0      | -0.100309               | 4.674913 | 2.328254  |
| 16     | 6      | 0      | -6.097640               | 0.122346 | -0.844365 |
| 17     | 1      | 0      | -7.048366               | 0.345503 | -0.366880 |
| 18     | 6      | 0      | -5.296459               | 1.170930 | -1.301483 |
| 19     | 1      | 0      | -5.604958               | 2.199963 | -1.146332 |
| 20     | 6      | 0      | -3.182193               | 2.064418 | -2.351244 |
| 21     | 1      | 0      | -3.777230               | 2.959496 | -2.521330 |
| 22     | 6      | 0      | -1.274942               | 8.483692 | 2.174159  |
| 23     | 1      | 0      | -1.280641               | 9.137432 | 3.042171  |
| 24     | 6      | 0      | -0.705656               | 6.352517 | 1.162733  |
| 25     | 6      | 0      | -1.269218               | 6.783961 | -0.042674 |
| 26     | 1      | 0      | -1.316611               | 6.121908 | -0.900302 |
| 27     | 6      | 0      | -1.022615               | 2.020151 | -1.704545 |
| 28     | 6      | 0      | -1.843206               | 8.053261 | -0.132471 |
| 29     | 1      | 0      | -2.304879               | 8.359804 | -1.066539 |
| 30     | 8      | 0      | -2.760500               | 1.672935 | 2.060719  |
| 31     | 6      | 0      | -5.680161               | 5.686179 | -1.186450 |
| 32     | 1      | 0      | -5.671164               | 6.331515 | -2.067263 |
| 33     | 1      | 0      | -5.866624               | 6.291136 | -0.292132 |
| 34     | 1      | 0      | -6.500661               | 4.964461 | -1.260382 |

---

|    |   |   |           |           |           |
|----|---|---|-----------|-----------|-----------|
| 35 | 6 | 0 | -2.889290 | 2.711554  | 2.755180  |
| 36 | 6 | 0 | -5.675392 | -1.200955 | -0.979421 |
| 37 | 1 | 0 | -6.267528 | -2.021948 | -0.585919 |
| 38 | 6 | 0 | -3.243898 | 2.618819  | 4.226966  |
| 39 | 1 | 0 | -2.861507 | 1.689318  | 4.656440  |
| 40 | 1 | 0 | -4.335962 | 2.617732  | 4.326210  |
| 41 | 1 | 0 | -2.859397 | 3.480494  | 4.777925  |
| 42 | 6 | 0 | -4.450854 | -1.475544 | -1.595244 |
| 43 | 1 | 0 | -4.102866 | -2.501144 | -1.662016 |
| 44 | 6 | 0 | 2.827820  | 1.369351  | -1.173515 |
| 45 | 6 | 0 | 3.919894  | 1.141651  | -2.230452 |
| 46 | 1 | 0 | 3.154890  | 2.144820  | -0.476048 |
| 47 | 1 | 0 | 2.715432  | 0.448115  | -0.589478 |
| 48 | 6 | 0 | 5.232100  | 0.717050  | -1.566523 |
| 49 | 1 | 0 | 3.593753  | 0.369255  | -2.940528 |
| 50 | 1 | 0 | 4.075636  | 2.058006  | -2.816195 |
| 51 | 1 | 0 | 5.610089  | 1.486748  | -0.890248 |
| 52 | 1 | 0 | 5.130699  | -0.186712 | -0.958873 |
| 53 | 6 | 0 | -0.037265 | -0.561318 | -0.317569 |
| 54 | 6 | 0 | -0.347831 | -1.583166 | 0.795326  |
| 55 | 1 | 0 | -0.838982 | -0.603370 | -1.064048 |
| 56 | 1 | 0 | 0.879397  | -0.876324 | -0.829000 |
| 57 | 6 | 0 | -1.774858 | -1.422766 | 1.318683  |
| 58 | 1 | 0 | -0.230331 | -2.589881 | 0.378341  |
| 59 | 1 | 0 | 0.381765  | -1.477143 | 1.610148  |
| 60 | 1 | 0 | -1.946986 | -0.423472 | 1.724702  |
| 61 | 1 | 0 | -2.482222 | -1.595875 | 0.502842  |
| 62 | 6 | 0 | 0.270701  | 1.987709  | -0.885171 |
| 63 | 6 | 0 | 1.490682  | 1.753164  | -1.827289 |
| 64 | 1 | 0 | 1.208883  | 0.958226  | -2.522123 |
| 65 | 1 | 0 | 1.630453  | 2.651072  | -2.441638 |
| 66 | 6 | 0 | 0.117699  | 0.871059  | 0.215256  |
| 67 | 1 | 0 | -0.747587 | 1.140680  | 0.826942  |
| 68 | 1 | 0 | 0.998531  | 0.925623  | 0.866784  |
| 69 | 7 | 0 | 6.318225  | 0.462590  | -2.529973 |
| 70 | 7 | 0 | -2.123294 | -2.397123 | 2.373055  |
| 71 | 7 | 0 | 7.734320  | -0.575334 | -3.807568 |
| 72 | 6 | 0 | 8.519687  | -1.678191 | -4.361794 |
| 73 | 1 | 0 | 7.911653  | -2.272730 | -5.046727 |
| 74 | 1 | 0 | 9.359285  | -1.254585 | -4.914392 |
| 75 | 1 | 0 | 8.880880  | -2.285342 | -3.527974 |
| 76 | 6 | 0 | 5.774090  | -1.956706 | -2.989364 |
| 77 | 1 | 0 | 5.734984  | -2.242062 | -1.929097 |
| 78 | 1 | 0 | 4.759081  | -1.795404 | -3.369537 |

|     |    |   |           |           |           |
|-----|----|---|-----------|-----------|-----------|
| 79  | 1  | 0 | 6.229187  | -2.774329 | -3.548945 |
| 80  | 6  | 0 | 6.590608  | -0.720542 | -3.111836 |
| 81  | 6  | 0 | 7.323032  | 1.359775  | -2.837057 |
| 82  | 1  | 0 | 7.330117  | 2.359528  | -2.435352 |
| 83  | 6  | 0 | 8.209842  | 0.712350  | -3.632920 |
| 84  | 1  | 0 | 9.141153  | 1.036930  | -4.067846 |
| 85  | 6  | 0 | -4.442744 | -1.464671 | 2.749610  |
| 86  | 1  | 0 | -5.052254 | -1.401191 | 3.655824  |
| 87  | 1  | 0 | -4.054281 | -0.469676 | 2.516359  |
| 88  | 1  | 0 | -5.083052 | -1.820297 | 1.932882  |
| 89  | 6  | 0 | -3.342331 | -2.443953 | 2.941056  |
| 90  | 6  | 0 | -4.623692 | -4.079984 | 4.311953  |
| 91  | 1  | 0 | -4.405597 | -5.071728 | 4.705783  |
| 92  | 1  | 0 | -4.930237 | -3.417262 | 5.126588  |
| 93  | 1  | 0 | -5.400214 | -4.163409 | 3.547819  |
| 94  | 7  | 0 | -3.407249 | -3.569419 | 3.675969  |
| 95  | 6  | 0 | -2.214678 | -4.253844 | 3.560147  |
| 96  | 1  | 0 | -2.065692 | -5.214557 | 4.023322  |
| 97  | 6  | 0 | -1.410507 | -3.522207 | 2.747694  |
| 98  | 1  | 0 | -0.415397 | -3.721293 | 2.390820  |
| 99  | 8  | 0 | 8.436573  | -1.904834 | -1.225821 |
| 100 | 16 | 0 | 7.749239  | -1.343192 | -0.019752 |
| 101 | 8  | 0 | 6.326688  | -1.813254 | 0.083251  |
| 102 | 8  | 0 | 7.894233  | 0.133183  | 0.108610  |
| 103 | 6  | 0 | 8.586976  | -2.053162 | 1.408507  |
| 104 | 6  | 0 | 8.201418  | -3.304262 | 1.892329  |
| 105 | 6  | 0 | 9.645257  | -1.368248 | 2.005745  |
| 106 | 6  | 0 | 8.883731  | -3.868826 | 2.968485  |
| 107 | 1  | 0 | 7.358705  | -3.814337 | 1.437184  |
| 108 | 6  | 0 | 10.320567 | -1.943369 | 3.081875  |
| 109 | 1  | 0 | 9.916115  | -0.384642 | 1.636226  |
| 110 | 6  | 0 | 9.957026  | -3.202765 | 3.576753  |
| 111 | 1  | 0 | 8.574500  | -4.840716 | 3.348072  |
| 112 | 1  | 0 | 11.140356 | -1.402200 | 3.550174  |
| 113 | 6  | 0 | 10.712201 | -3.834957 | 4.723216  |
| 114 | 1  | 0 | 11.153534 | -3.077538 | 5.380020  |
| 115 | 1  | 0 | 10.060216 | -4.471588 | 5.331389  |
| 116 | 1  | 0 | 11.533675 | -4.467193 | 4.359285  |
| 117 | 8  | 0 | -3.389746 | -4.093464 | 0.115384  |
| 118 | 16 | 0 | -4.523733 | -4.868544 | 0.710454  |
| 119 | 8  | 0 | -5.642090 | -3.991645 | 1.195324  |
| 120 | 8  | 0 | -4.096195 | -5.870150 | 1.724682  |
| 121 | 6  | 0 | -5.224766 | -5.805586 | -0.664265 |
| 122 | 6  | 0 | -6.595787 | -6.057474 | -0.713372 |

|     |   |   |           |           |           |
|-----|---|---|-----------|-----------|-----------|
| 123 | 6 | 0 | -4.385001 | -6.326536 | -1.650839 |
| 124 | 6 | 0 | -7.121754 | -6.830575 | -1.748604 |
| 125 | 1 | 0 | -7.238417 | -5.637947 | 0.053646  |
| 126 | 6 | 0 | -4.921056 | -7.098235 | -2.679994 |
| 127 | 1 | 0 | -3.321179 | -6.115480 | -1.609110 |
| 128 | 6 | 0 | -6.296495 | -7.362506 | -2.747557 |
| 129 | 1 | 0 | -8.192317 | -7.023316 | -1.782069 |
| 130 | 1 | 0 | -4.261745 | -7.502708 | -3.445839 |
| 131 | 6 | 0 | -6.874650 | -8.173441 | -3.884509 |
| 132 | 1 | 0 | -6.186706 | -8.964117 | -4.204573 |
| 133 | 1 | 0 | -7.821471 | -8.644761 | -3.599848 |
| 134 | 1 | 0 | -7.075530 | -7.545101 | -4.763156 |
| 135 | 6 | 0 | -2.265169 | 1.791242  | -3.557806 |
| 136 | 1 | 0 | -2.158873 | 2.665343  | -4.206217 |
| 137 | 1 | 0 | -2.533940 | 0.915549  | -4.147207 |
| 138 | 6 | 0 | 1.457746  | 5.030724  | 0.823676  |
| 139 | 1 | 0 | 2.186471  | 5.028842  | 1.635345  |
| 140 | 1 | 0 | 1.664379  | 5.855529  | 0.136052  |
| 141 | 6 | 0 | -0.718554 | 7.208910  | 2.270745  |
| 142 | 1 | 0 | -0.301805 | 6.872188  | 3.217693  |
| 143 | 6 | 0 | -3.658721 | -0.427330 | -2.064235 |
| 144 | 1 | 0 | -2.710109 | -0.661049 | -2.543272 |

---

## References

1. Rafał Kowalczyk, Jacek Skarżewski . *Tetrahedron: Asymmetry*, 2009, 20(21): 2467-2473
